# Supplementary material for: Interspecific variation in the limb long bones among modern rhinoceroses—extent and drivers
Source: PeerJ journal article supplement (doi:10.7717/peerj.7647), 2019-09-26
Supplement: TableS1-FigureS1.pdf [file TableS1-FigureS1.pdf]

**Data S1: Designation and location of anatomical landmarks placed on each bone.**

| <b>Bone</b>    | <b>Anatomical LM</b> | <b>Curve sliding semi-LM</b> | <b>Surface sliding semi-LM</b> | <b>Total</b> |
|----------------|----------------------|------------------------------|--------------------------------|--------------|
| <b>Humerus</b> | 35                   | 639                          | 1437                           | 2111         |
| <b>Radius</b>  | 23                   | 393                          | 920                            | 1336         |
| <b>Ulna</b>    | 21                   | 343                          | 822                            | 1142         |
| <b>Femur</b>   | 27                   | 612                          | 1031                           | 1670         |
| <b>Tibia</b>   | 24                   | 384                          | 854                            | 1262         |
| <b>Fibula</b>  | 12                   | 269                          | 454                            | 735          |

**Table S1A: Total number of anatomical landmarks (LM), curve sliding and surface sliding semi-landmarks for each bone.**

| <b>LM</b> | <b>Designation</b>                                                                                   |
|-----------|------------------------------------------------------------------------------------------------------|
| 1         | Most distal point of the lateral border of the bicipital groove                                      |
| 2         | Most proximal point of the lateral border of the bicipital groove                                    |
| 3         | Most proximal point of the intermediate tubercle                                                     |
| 4         | Most proximal point of the medial border of the bicipital groove                                     |
| 5         | Most distal point of the medial border of the bicipital groove                                       |
| 6         | Most distal point of the intermediate tubercle                                                       |
| 7         | Most medial point of the top of the lesser tubercle                                                  |
| 8         | Most cranial point of the lesser tubercle convexity                                                  |
| 9         | Most medio-caudal point of the lesser tubercle convexity                                             |
| 10        | Most medial point of the humeral head surface                                                        |
| 11        | Most caudo-distal point of the humeral head surface                                                  |
| 12        | Contact point between the tricipital line and the caudal border of the articular head surface        |
| 13        | Most lateral point of the humeral head surface                                                       |
| 14        | Most caudal point of the greater tubercle convexity                                                  |
| 15        | Most proximal point of the greater tubercle convexity                                                |
| 16        | Most cranial point of the greater tubercle convexity crest                                           |
| 17        | Most proximal point of the m. infraspinatus lateral insertion                                        |
| 18        | Most distal point of the m. infraspinatus lateral insertion                                          |
| 19        | Most proximal point of the deltoid tuberosity                                                        |
| 20        | Most distal point of the deltoid tuberosity                                                          |
| 21        | Most proximal point of the epicondylar crest tuberosity                                              |
| 22        | Most distal point of the epicondylar crest tuberosity                                                |
| 23        | Most lateral point of the lateral epicondyle                                                         |
| 24        | Most distal point of the lateral epicondyle                                                          |
| 25        | Most proximo-lateral point of the capitulum                                                          |
| 26        | Most cranio-proximal point of contact between the trochlea and the capitulum                         |
| 27        | Most cranial point of the trochlea groove                                                            |
| 28        | Most cranio-medial point of the dorsal side of the trochlea                                          |
| 29        | Most distal contact point between the trochlea border and the medial development of the trochlea lip |
| 30        | Most cranio-medial point of the ventral side of the trochlea                                         |
| 31        | Most cranio-lateral point of the ventral side of the trochlea                                        |
| 32        | Most caudo-distal point of contact between the capitulum and the trochlea                            |
| 33        | Most medial point of the medial epicondyle                                                           |
| 34        | Most caudal point of the medial epicondyle                                                           |
| 35        | Most lateral point of the medial epicondyle                                                          |

**Table S1B: Designation of anatomical landmarks on the humerus.**

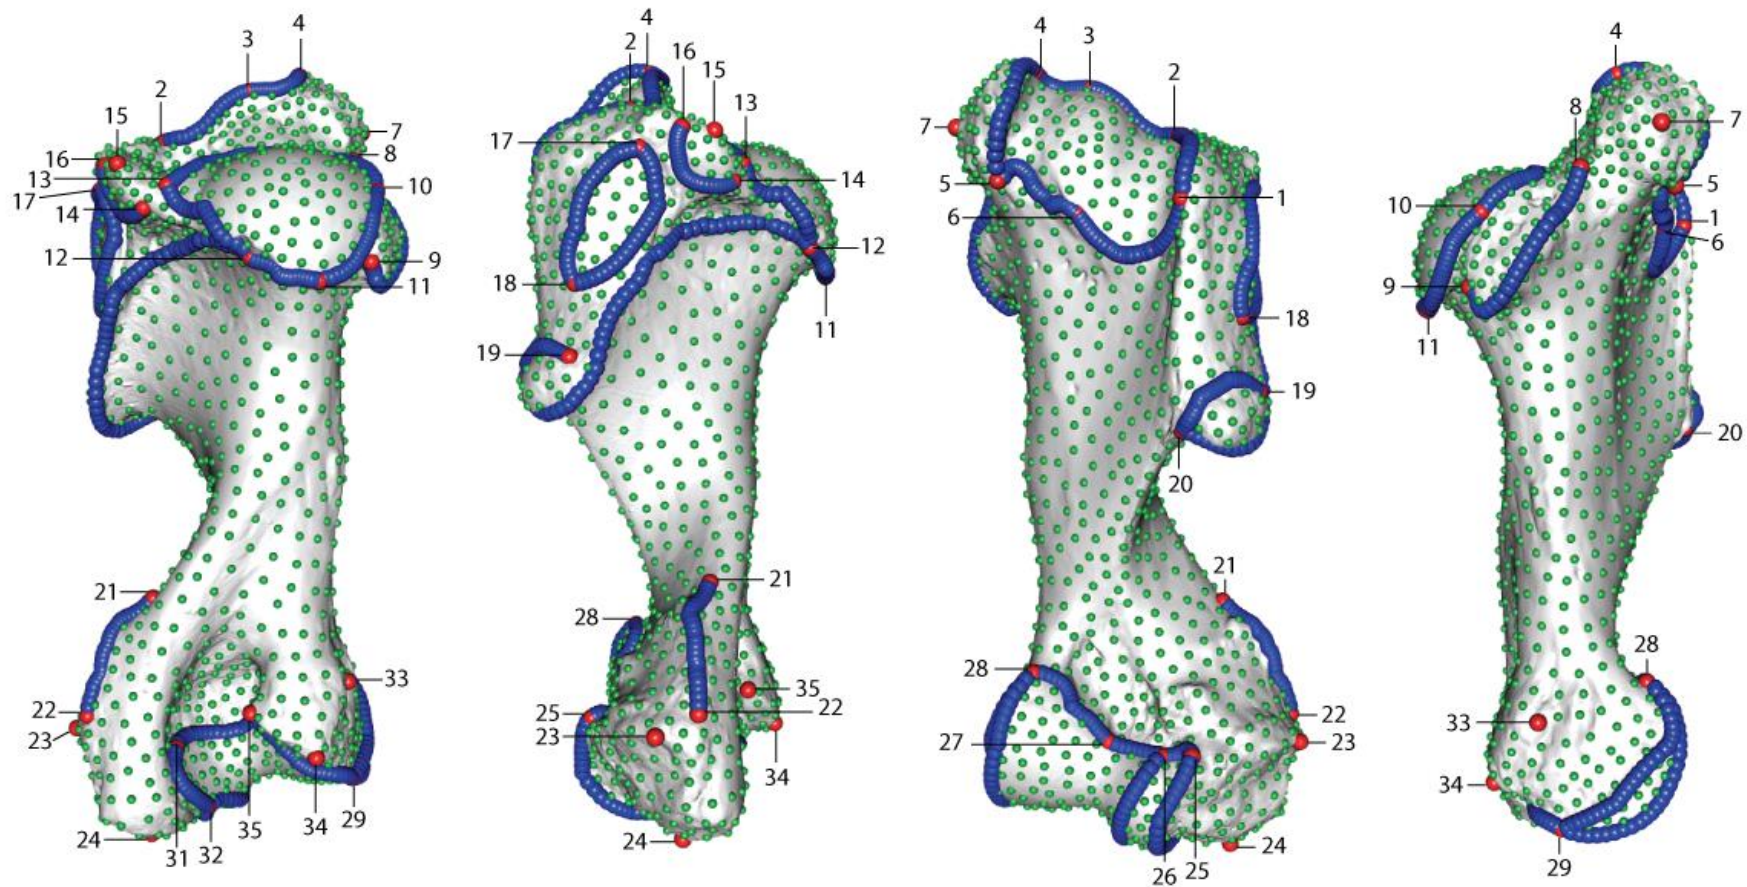

**Figure S1C: Location of anatomical landmarks (red spheres), curve sliding (blue spheres) and surface sliding (green spheres) semi-landmarks placed on the humerus.** From left to right: caudal, lateral, cranial and medial views. Numbers refer to anatomical landmarks designation detailed in Table S1B. Landmark n°30 situated in the olecranon fossa cannot be seen.

| <b>LM</b> | <b>Designation</b>                                                                            |
|-----------|-----------------------------------------------------------------------------------------------|
| <b>1</b>  | Most caudo-lateral point of the lateral glenoid cavity                                        |
| <b>2</b>  | Most cranio-lateral point of the lateral glenoid cavity                                       |
| <b>3</b>  | Tip of the coronoid process                                                                   |
| <b>4</b>  | Most cranial point of the medial glenoid cavity                                               |
| <b>5</b>  | Most caudo-medial point of the medial glenoid cavity                                          |
| <b>6</b>  | Tip of the palmar process of the glenoid cavity ridge                                         |
| <b>7</b>  | Most cranial point of the lateral insertion relief                                            |
| <b>8</b>  | Most lateral point of the lateral insertion relief                                            |
| <b>9</b>  | Most caudo-distal point of the proximo-lateral articular facet for the ulna                   |
| <b>10</b> | Most caudo-distal point of the proximo-medial articular facet for the ulna                    |
| <b>11</b> | Most proximal point of the interosseous crest (= most distal point of the interosseous space) |
| <b>12</b> | Most distal point of the interosseous crest (crossing the distal epiphysis line)              |
| <b>13</b> | Most cranio-lateral point of the disto-lateral articulation surface for ulna                  |
| <b>14</b> | Most proximo-lateral point of the disto-lateral articulation surface for ulna                 |
| <b>15</b> | Most caudo-lateral point of the disto-lateral articulation surface for ulna                   |
| <b>16</b> | Most medial point of the transversal crest                                                    |
| <b>17</b> | Tip of the radial styloid process                                                             |
| <b>18</b> | Maximum of curvature of the cranial ridge of the articular facet for the scaphoid             |
| <b>19</b> | Most cranio-lateral point of the articular facet for the scaphoid                             |
| <b>20</b> | Most lateral point of the articular facet for the semilunar                                   |
| <b>21</b> | Most caudo-lateral point of the articular facet for the semilunar                             |
| <b>22</b> | Most caudo-lateral point of the articular facet for the scaphoid                              |
| <b>23</b> | Most cranio-proximal point of the medial facet of distal radius                               |

**Table S1D: Designation of anatomical landmarks on the radius.**

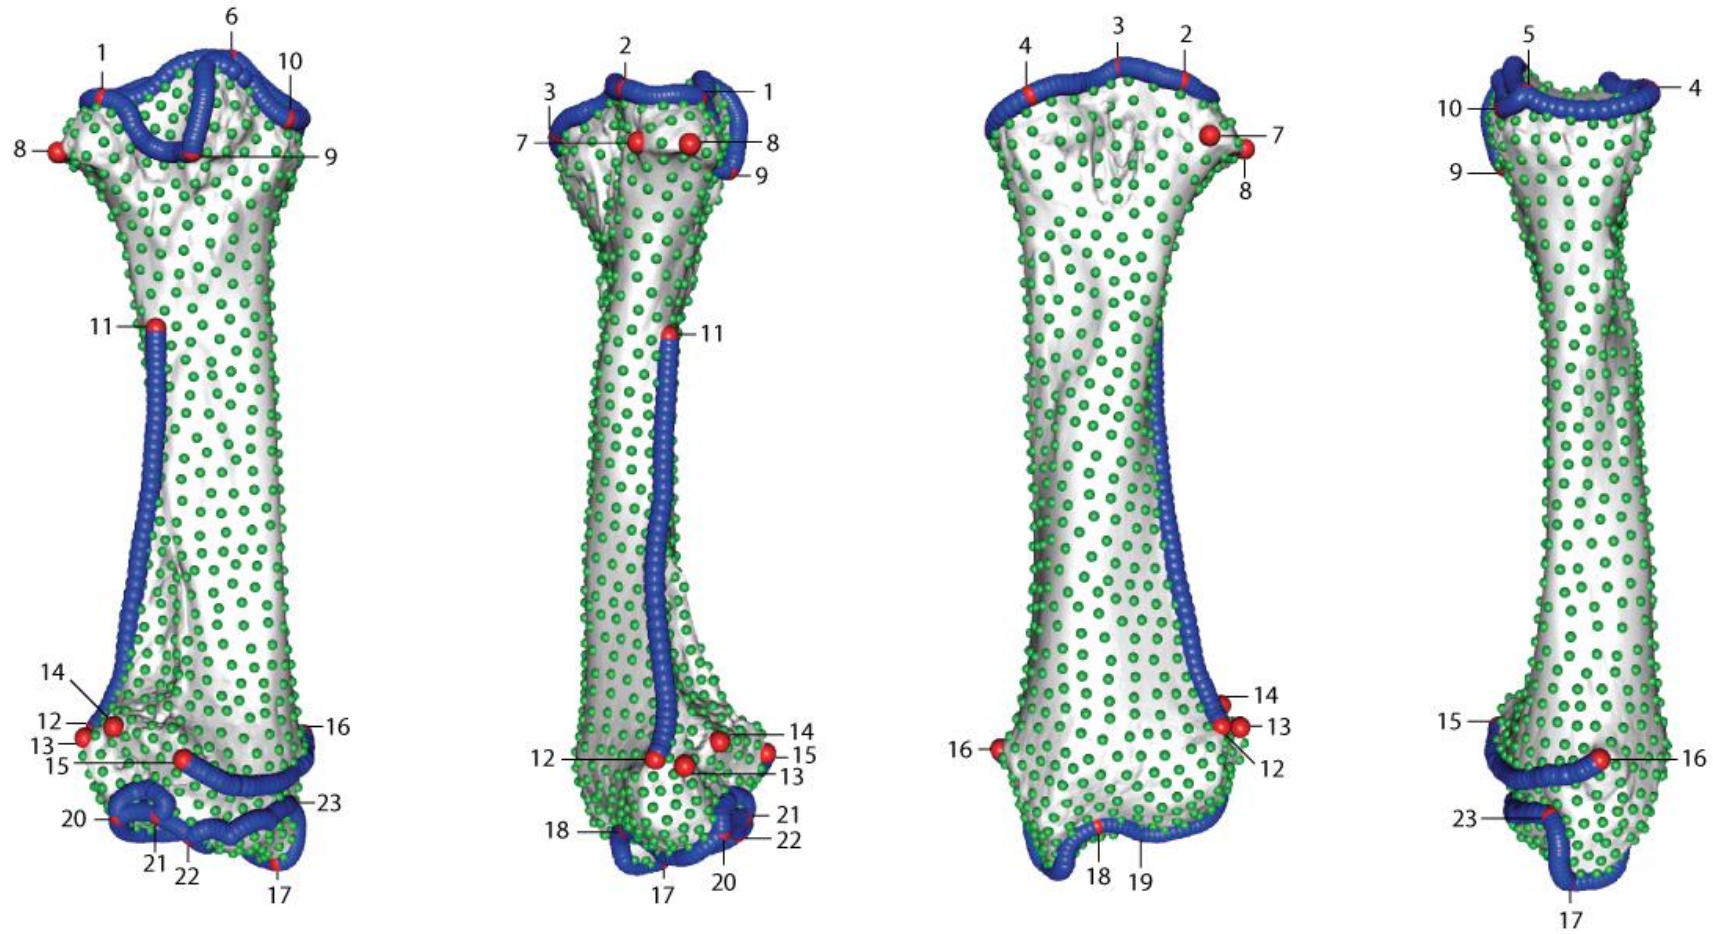

**Figure S1E: Location of anatomical landmarks (red spheres), curve sliding (blue spheres) and surface sliding (green spheres) semi-landmarks placed on the radius. From left to right: caudal, lateral, cranial and medial views. Numbers refer to anatomical landmarks designation detailed in Table S1D.**

| <b>LM</b> | <b>Designation</b>                                                                                                    |
|-----------|-----------------------------------------------------------------------------------------------------------------------|
| <b>1</b>  | Most proximo-cranial point of the olecranon tuberosity cranial border                                                 |
| <b>2</b>  | Most lateral point of the olecranon tuberosity                                                                        |
| <b>3</b>  | Most caudo-distal point of the olecranon tuberosity                                                                   |
| <b>4</b>  | Most medial point of the olecranon tuberosity                                                                         |
| <b>5</b>  | Most proximal point of the olecranon tuberosity                                                                       |
| <b>6</b>  | Cranial tip of the anconeal process                                                                                   |
| <b>7</b>  | Most distal point of the lateral part of the trochlear notch articular surface                                        |
| <b>8</b>  | Maximum concavity point of the distal border of the trochlear notch articular surface                                 |
| <b>9</b>  | Most distal point of the medial part of the trochlear notch articular surface                                         |
| <b>10</b> | Most distal point of the proximo-medial articular facet for the radius                                                |
| <b>11</b> | Most distal point of the proximo-lateral articular facet for the radius                                               |
| <b>12</b> | Most distal point of the proximal synostosis surface for the radius (= most proximal point of the interosseous space) |
| <b>13</b> | Most medio-caudal point of the distal radio-ulnar synostosis surface                                                  |
| <b>14</b> | Most disto-medial point of the articular surface with the semilunar bone                                              |
| <b>15</b> | Most cranio-lateral point of the articular surface with the semilunar bone                                            |
| <b>16</b> | Most disto-lateral point of the articular surface with the semilunar bone                                             |
| <b>17</b> | Most cranio-lateral point of the distal radio-ulnar synostosis surface                                                |
| <b>18</b> | Most lateral point of the distal epiphysis                                                                            |
| <b>19</b> | Caudo-distal tip of ulnar styloid process                                                                             |
| <b>20</b> | Most proximal contact point between the articular surfaces for the pisiform and the triquetrum                        |
| <b>21</b> | Most distal contact point between the caudal border of the ulna and the articular surface with the pisiform           |

**Table S1F: Designation of anatomical landmarks on the ulna.**



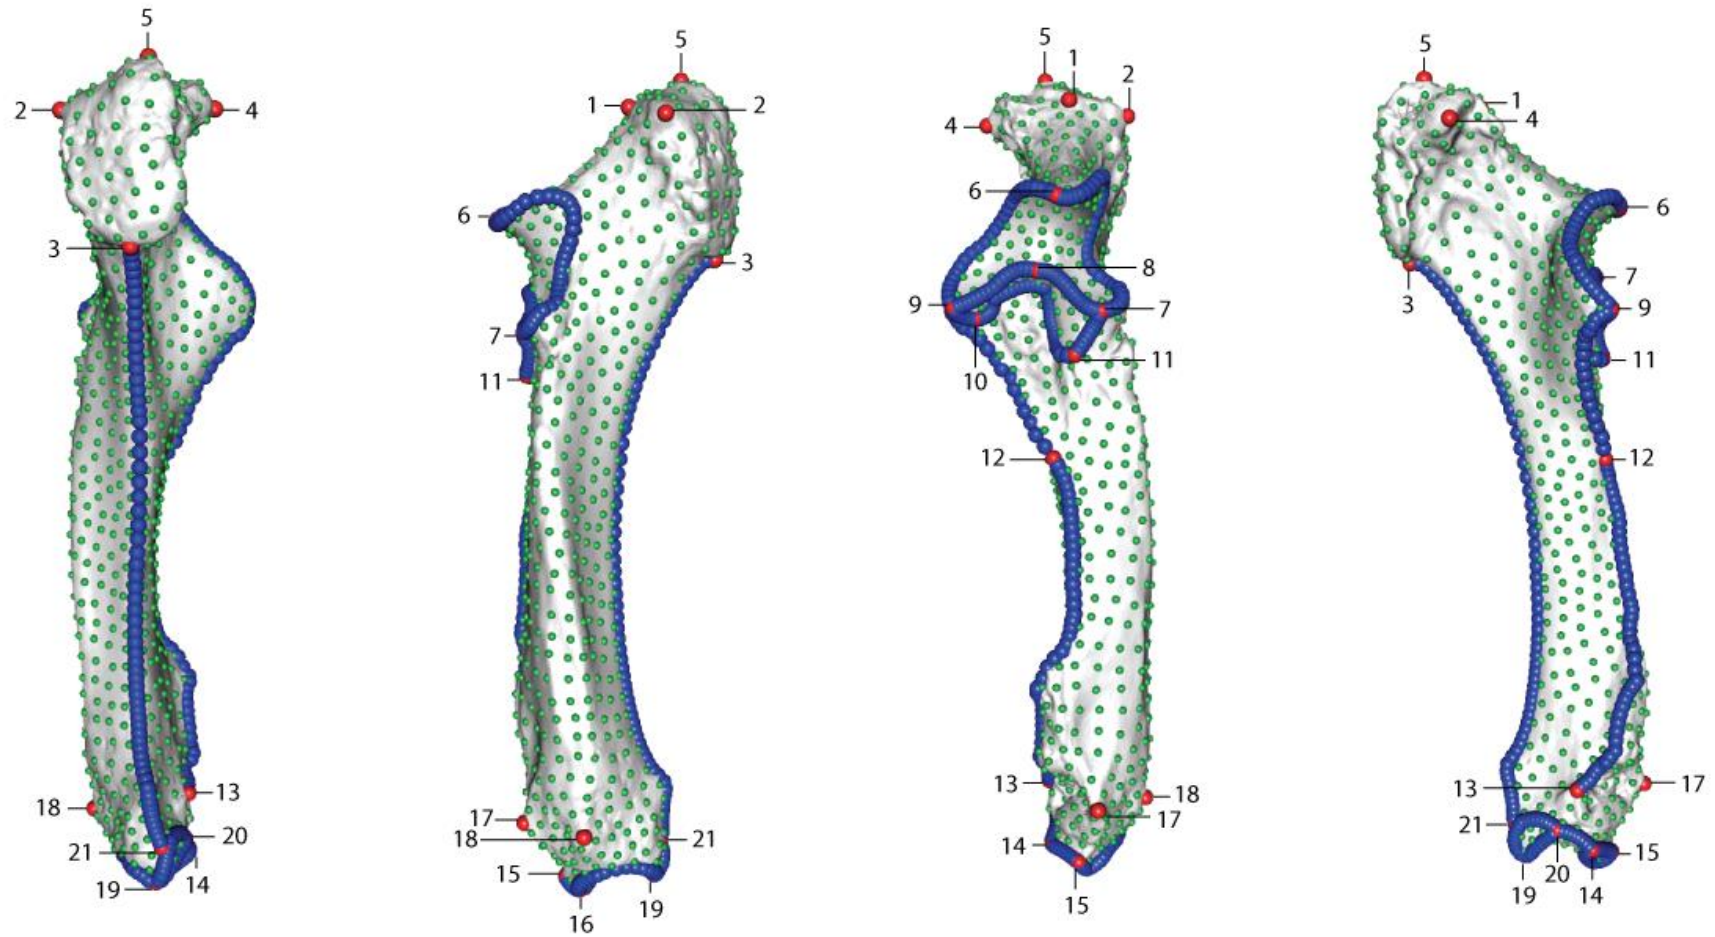

**Figure S1G: Location of anatomical landmarks (red spheres), curve sliding (blue spheres) and surface sliding (green spheres) semi-landmarks placed on the ulna.** From left to right: caudal, lateral, cranial and medial views. Numbers refer to anatomical landmarks designation detailed in Table S1F.

| <b>LM</b> | <b>Designation</b>                                                                                     |
|-----------|--------------------------------------------------------------------------------------------------------|
| 1         | Most proximo-cranial point of the greater trochanter                                                   |
| 2         | Most proximo-caudal point of the greater trochanter                                                    |
| 3         | Most medial point of the greater trochanter convexity                                                  |
| 4         | Most distal point of the intertrochanteric crest                                                       |
| 5         | Most disto-caudal point of the greater trochanter                                                      |
| 6         | Most cranio-lateral point of the convexity of the greater trochanter                                   |
| 7         | Most proximal contact point between the intertrochanteric line and the medial line of the cranial face |
| 8         | Most lateral point of the border of the head                                                           |
| 9         | Most proximal point of the lesser trochanter                                                           |
| 10        | Most distal point of the lesser trochanter                                                             |
| 11        | Most proximal point of the gluteal tuberosity on the third trochanter                                  |
| 12        | Most distal point of the gluteal tuberosity on the third trochanter                                    |
| 13        | Most medial point of the medial epicondyle                                                             |
| 14        | Contact point between the intercondylar line and the medial condyle                                    |
| 15        | Contact point between the intercondylar line and the lateral condyle                                   |
| 16        | Most lateral point of the lateral epicondyle                                                           |
| 17        | Most proximal point of the lateral lip of the trochlea                                                 |
| 18        | Most proximal point of the trochlear groove                                                            |
| 19        | Most proximal point of the medial lip of the trochlea                                                  |
| 20        | Most distal point of the medial lip of the trochlea                                                    |
| 21        | Distal maximum of curvature of the trochlear groove                                                    |
| 22        | Most distal point of the lateral lip of the trochlea                                                   |
| 23        | Most medial point of the fossa extensoria                                                              |
| 24        | Most lateral point of the fossa extensoria                                                             |
| 25        | Most cranial point of the fossa extensoria                                                             |
| 26        | Most proximo-medial point of the lateral condyle articular surface                                     |
| 27        | Most proximo-lateral point of the medial condyle articular surface                                     |

**Table S1H: Designation of anatomical landmarks on the femur.**



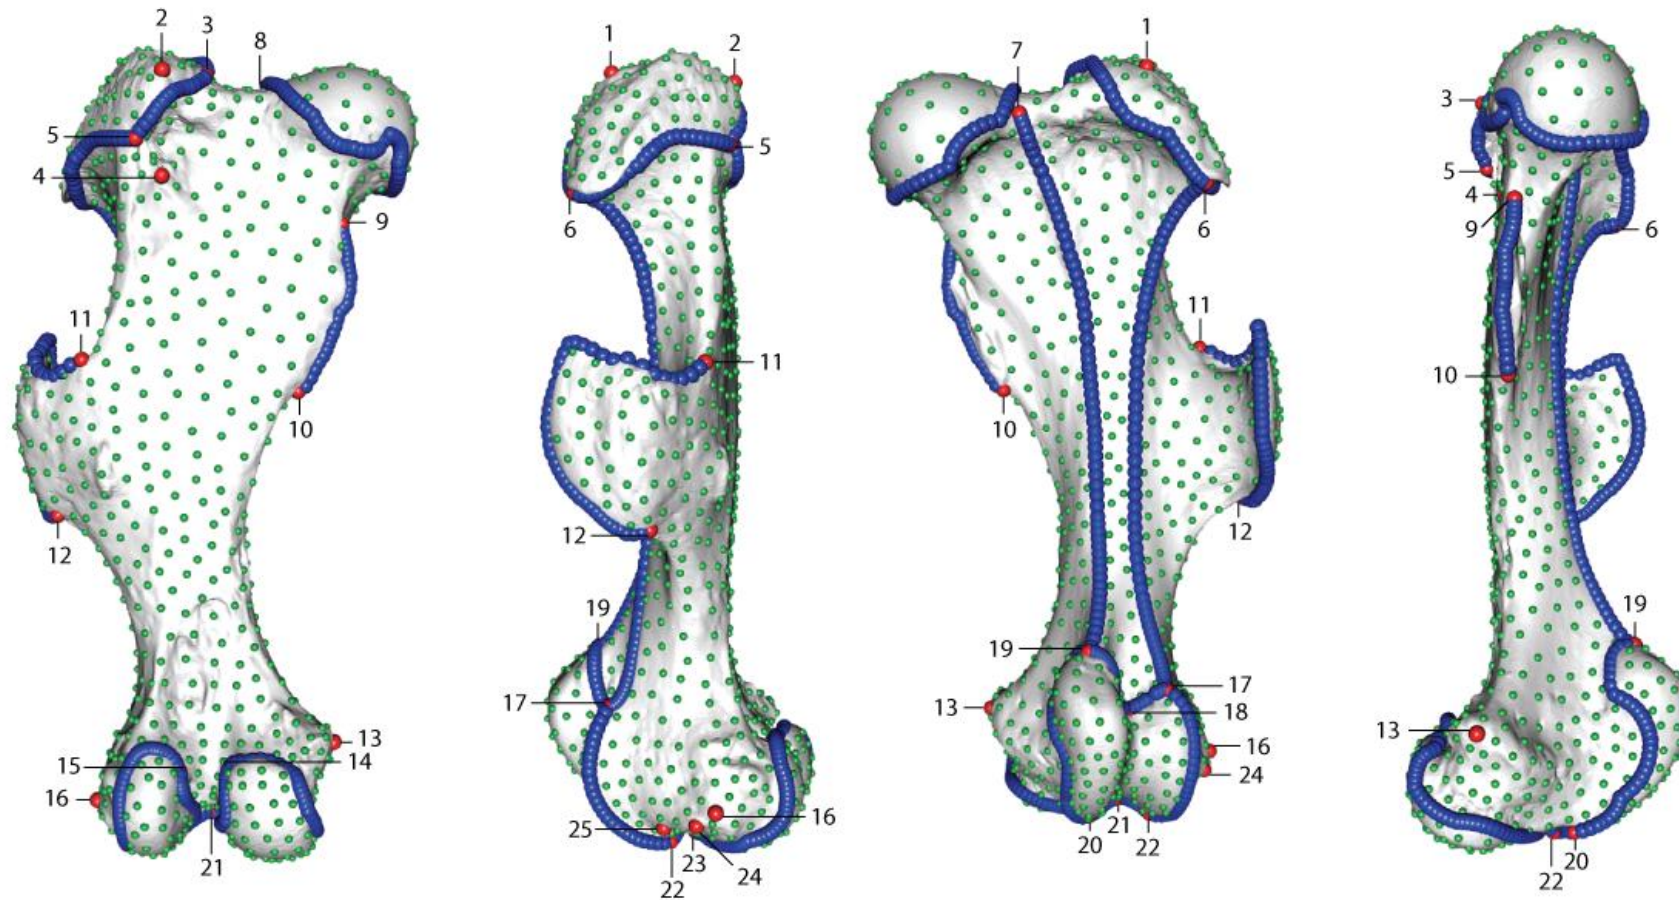

**Figure S1I: Location of anatomical landmarks (red spheres), curve sliding (blue spheres) and surface sliding (green spheres) semi-landmarks placed on the femur.** From left to right: caudal, lateral, cranial and medial views. Numbers refer to anatomical landmarks designation detailed in Table S1H. Landmarks n°26 and 27 situated in the intercondylar space cannot be seen.

| <b>LM</b> | <b>Designation</b>                                                                             |
|-----------|------------------------------------------------------------------------------------------------|
| <b>1</b>  | Most proximal point of the lateral tubercle of the intercondylar eminence                      |
| <b>2</b>  | Most proximo-cranial point of the lateral tubercle of the intercondylar eminence               |
| <b>3</b>  | Most cranial point of the articular surface of the lateral condyle                             |
| <b>4</b>  | Most caudal point of the articular surface of the lateral condyle                              |
| <b>5</b>  | Most caudal point of the lateral tubercle of the intercondylar eminence                        |
| <b>6</b>  | Most caudo-proximal point of the medial tubercle of the intercondylar eminence                 |
| <b>7</b>  | Most proximal point of the medial tubercle of the intercondylar eminence                       |
| <b>8</b>  | Most cranial point of the articular surface of the medial condyle                              |
| <b>9</b>  | Most caudal point of the articular surface of the medial condyle                               |
| <b>10</b> | Most proximal point of the proximal tibio-fibular synostosis surface                           |
| <b>11</b> | Most distal point of the proximal tibio-fibular synostosis surface                             |
| <b>12</b> | Most proximal point of the lateral part of the tibial tuberosity                               |
| <b>13</b> | Most distal point of the lateral part of the tibial tuberosity                                 |
| <b>14</b> | Most distal point of the tibial tuberosity groove                                              |
| <b>15</b> | Most proximal point of the medial part of the tibial tuberosity                                |
| <b>16</b> | Most caudal point of the medial condyle                                                        |
| <b>17</b> | Most proximal point of the distal tibio-fibular synostosis surface                             |
| <b>18</b> | Most caudo-lateral point of the distal articular surface                                       |
| <b>19</b> | Most cranio-lateral point of the distal articular surface                                      |
| <b>20</b> | Most cranio-distal point of the intermediate ridge of the distal articular surface             |
| <b>21</b> | Most distal point of the contact between the medial malleolus and the distal articular surface |
| <b>22</b> | Most distal point of the medial part of the distal articular surface                           |
| <b>23</b> | Most caudo-distal point of the intermediate ridge of the distal articular surface              |
| <b>24</b> | Most medial point of the medial malleolus                                                      |

**Table S1J: Designation of anatomical landmarks on the tibia.**

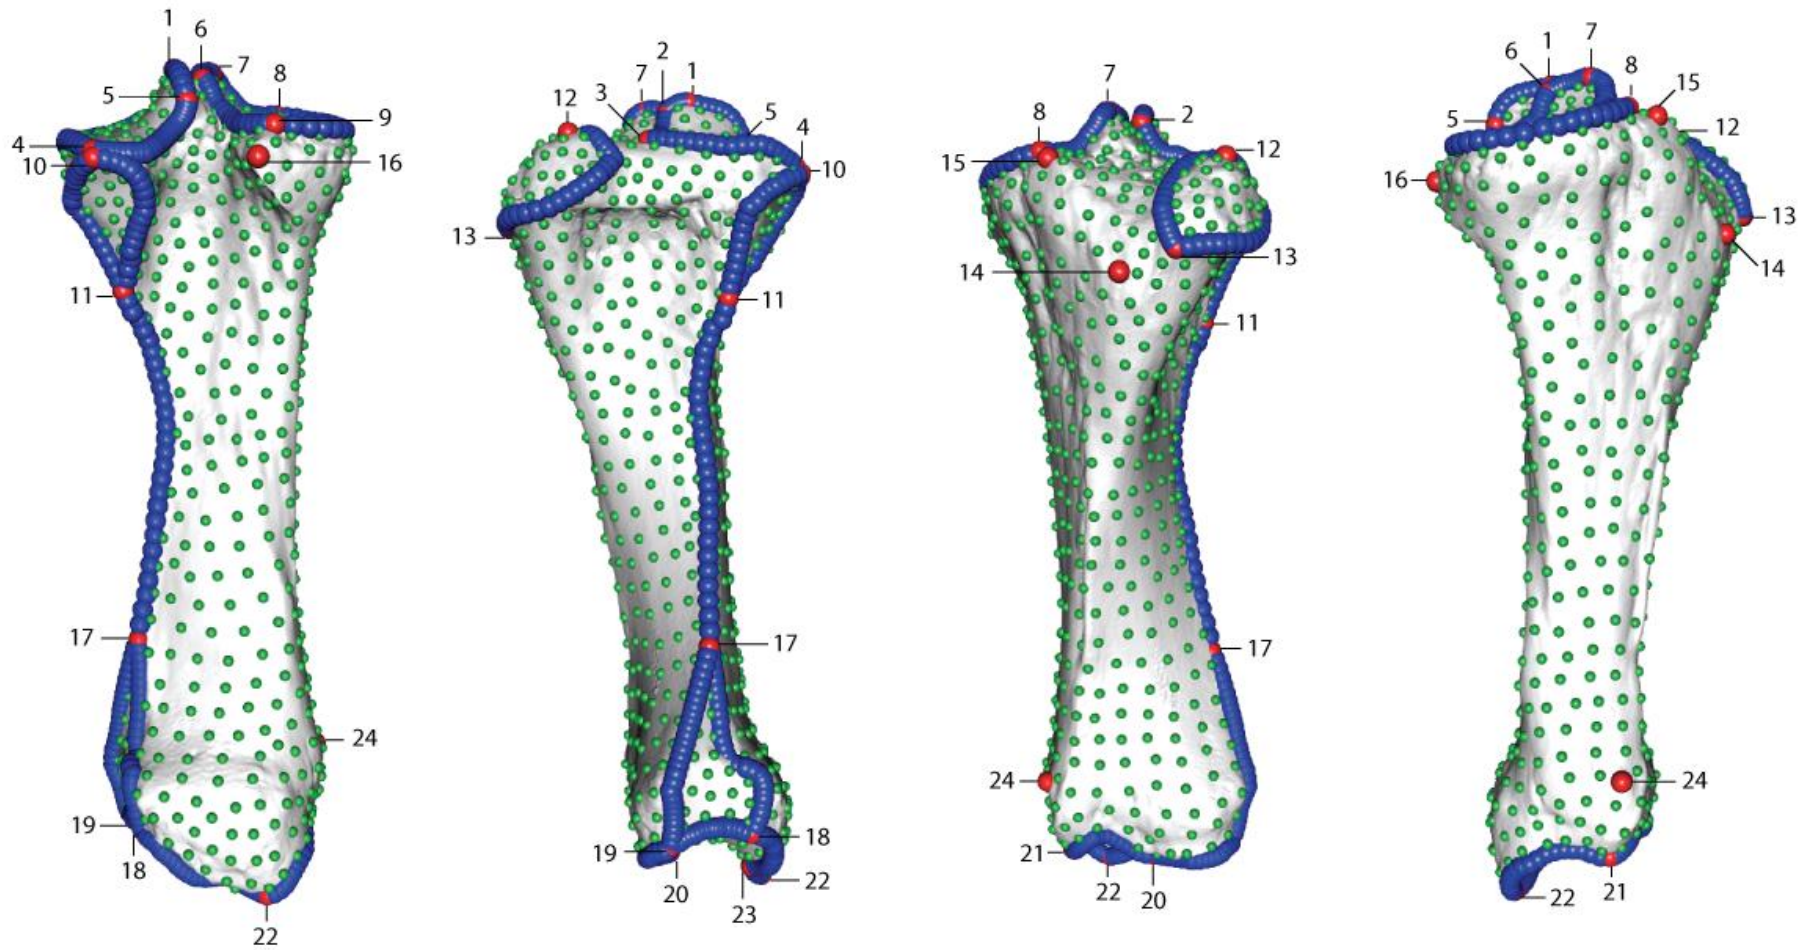

**Figure S1K: Location of anatomical landmarks (red spheres), curve sliding (blue spheres) and surface sliding (green spheres) semi-landmarks placed on the tibia.** From left to right: caudal, lateral, cranial and medial views. Numbers refer to anatomical landmarks designation detailed in Table S1J.

| <b>LM</b> | <b>Designation</b>                                                                 |
|-----------|------------------------------------------------------------------------------------|
| <b>1</b>  | Most proximal point of the proximal tibio-fibular synostosis surface               |
| <b>2</b>  | Most caudo-medial point of the proximal tibio-fibular synostosis surface           |
| <b>3</b>  | Most cranio-lateral point of the proximal tibio-fibular synostosis surface         |
| <b>4</b>  | Most proximal point of the distal tibio-fibular synostosis surface                 |
| <b>5</b>  | Most caudal point of the distal articular facet                                    |
| <b>6</b>  | Most distal point of the caudal part of the distal articular facet                 |
| <b>7</b>  | Most distal point of the cranial part of the distal articular facet                |
| <b>8</b>  | Most cranial point of the distal articular facet                                   |
| <b>9</b>  | Distal tip of the caudal ridge of the lateral malleolar sulcus                     |
| <b>10</b> | Distal tip of the cranial ridge of the lateral malleolar sulcus                    |
| <b>11</b> | Most lateral point of the cranial ridge of the lateral malleolar sulcus            |
| <b>12</b> | Most disto-medial point of the proximal epiphysis = end of the latero-caudal crest |

**Table S1L: Designation of anatomical landmarks on the fibula.**

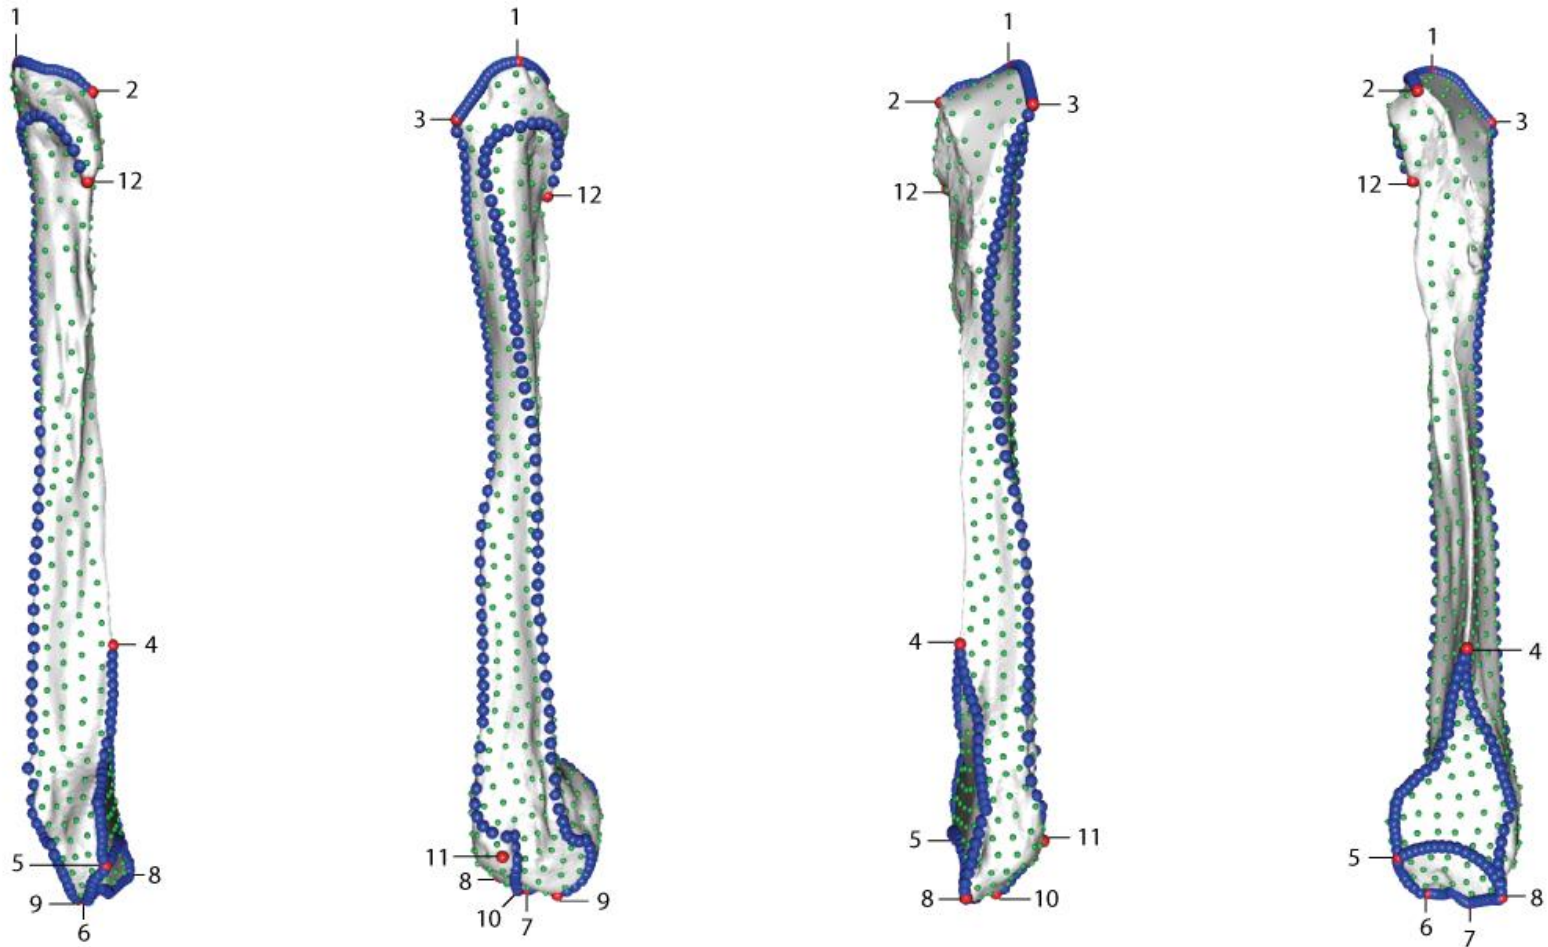

**Figure S1M: Location of anatomical landmarks (red spheres), curve sliding (blue spheres) and surface sliding (green spheres) semi-landmarks placed on the fibula.** From left to right: caudal, lateral, cranial and medial views. Numbers refer to anatomical landmarks designation detailed in Table S1L.
